# Supplementary material for: Synchronicity in the Workplace: A Mixed Method Study of the Associations Between Synchronicity, Meaningful Work and Work Engagement
Source: Research Square preprint supplement (doi:10.21203/rs.3.rs-6057897/v1), 2025-05-06
Supplement: Supplementary file 1 [file 4c12f8a578c4e6e9c60d9614.docx]

**Appendix A**

**Structural and Textual Description**

***Structural Description:***

The structural nuances of WRSEs reveal a complex framework where diverse experiences —such as meaningful encounters, unforeseen beneficial events, timely signs and knowledge, intuitive nudges, and meditative revelations—are intricately interwoven. These experiences are characterised by their ineffable quality, often perceived as being orchestrated by an esoteric force. This perception awakens individuals from routine conditionings, propelling them into heightened states of awareness and prompting significant actions related to work or career. This framework highlights the transformational potential of WRSEs, which act as catalysts for personal and professional evolution.

***Textural Description:***

The emotional contour of WRSEs is defined initially by a profound sense of being on the right path, deepened through enriched, interpersonal connections, and underpinned by an acute sense of interconnectedness within a grander, esoteric plan, illustrating how WRSEs enhance meaningful work. Participants frequently describe a renewed alignment with their life’s purpose, infused with confidence and creativity, transforming their routine into a journey of profound engagement. At the core of their professional lives is a profound joy and gratitude, which significantly enhances their engagement at work.

**Appendix B**

**Modified Synchronicity Awareness and Meaning-Detecting (SAMD) Scale (Russo-Netzer & Icekson, 2023)**

***Synchronicity Awareness Subscale***

Please answer the questions below in relation to your work/career. Relating to your work/career, how often have you experienced the following? (0 = never, 1 = once, 2 = twice or more, 3 = rarely, 4 = often, 5 = all the time)

1. I felt that I was “in the right place, at the right time” with my work/career.

2. I ran into something or someone that I thought about in relation to my work in an unexpected place.

3. I ran into a situation or a personal encounter that opened up new opportunities related to my work.

4. I experienced an extraordinary synchronisation of work-related thoughts, behaviour, or words with another person.

5. I received an answer to a certain work-related need I had in an unpredictable way (e.g., from a colleague/friend/acquaintance, in a work project, or a work opportunity).

6. I thought or dreamt about a person related to my work, and then I met the person somehow in the real world shortly afterwards.

7. I thought about a person related to my work, and the person contacted me unexpectedly shortly afterwards.

8. I thought about a particular work-related idea, and then I saw it as an external image (e.g., a quote, an ad, or a song)

9. While in nature, I felt a strong sense of connection to my work.

***Meaning detecting in the synchronicity events or experiences subscale***

Indicate the degree to which each of these items best describes you: (1 = not at all, to 7 = to a high degree)

10. I believe that unexplained events enable new discoveries and developments in my work.

11. I find signs of inner feelings in the external stimuli in the work environment around me.

12. I find meaning in unexplained work-related occurrences.

13. I believe that listening to internal and external occurrences enables new discoveries related to my work.

14. I sometimes feel that the environment “sends” me signals relating to my work.

15. Following experiences I’ve had, I have a sense of deep knowing of myself and my work.

16. I am open to experiences in my work that may not necessarily be explained by reason or causality.

17. I tend to be attentive to intuition in my everyday work life.

18. I am curious about surprising events in my work.

19. I walk around in the world with a sense of awe and wonder from the opportunities and surprises that my work has to offer.

20. It happens that things related to issues I am concerned with suddenly appear more in my everyday work life.

21. I believe that there is something to be learned from any event in my work.

22. I tend to be attentive to physical and bodily sensations in my work (e.g., goosebumps, pain, sense of warmth).
